# Supplementary material
Source: publisher site journal article supplement (https://www.dovepress.com/article/601873)
Supplement: Supplementary file 1 [file 601873%20Additional%20File%201.docx]

**Additional File 1**

**STROBE Statement—Checklist of items that should be included in reports of cross-sectional studies**

**Study Title:** Professional compromise and its association with burnout, job satisfaction, and patient satisfaction among physicians in a Chinese tertiary hospital: a cross-sectional study

**Authors:** [Author names]

| **Item No** | **Recommendation** | **Reported on page/section** |
| --- | --- | --- |
| **Title and abstract** | | |
| 1 | (a) Indicate the study's design with a commonly used term in the title or the abstract | Title; Abstract (Methods) |
|  | (b) Provide in the abstract an informative and balanced summary of what was done and what was found | Abstract |
| **Introduction** | | |
| 2 | Background/rationale: Explain the scientific background and rationale for the investigation being reported | Background, paragraphs 1-7 |
| 3 | Objectives: State specific objectives, including any prespecified hypotheses | Background, final paragraph |
| **Methods** | | |
| 4 | Study design: Present key elements of study design early in the paper | Methods—Study design and setting, paragraph 1 |
| 5 | Setting: Describe the setting, locations, and relevant dates, including periods of recruitment, exposure, follow-up, and data collection | Methods—Study design and setting |
| 6 | Participants: (a) Give the eligibility criteria, and the sources and methods of selection of participants | Methods—Participants |
| 7 | Variables: Clearly define all outcomes, exposures, predictors, potential confounders, and effect modifiers. Give diagnostic criteria, if applicable | Methods—Measures |
| 8 | Data sources/measurement: For each variable of interest, give sources of data and details of methods of assessment (measurement). Describe comparability of assessment methods if there is more than one group | Methods—Measures; Methods—Data collection procedures |
| 9 | Bias: Describe any efforts to address potential sources of bias | Methods—Data collection procedures; Discussion—Strengths and limitations |
| 10 | Study size: Explain how the study size was arrived at | Methods—Participants, final paragraph |
| 11 | Quantitative variables: Explain how quantitative variables were handled in the analyses. If applicable, describe which groupings were chosen and why | Methods—Statistical analysis |
| 12 | (a) Statistical methods: Describe all statistical methods, including those used to control for confounding | Methods—Statistical analysis |
|  | (b) Describe any methods used to examine subgroups and interactions | Methods—Statistical analysis |
|  | (c) Explain how missing data were addressed | Methods—Participants (exclusion criteria) |
|  | (d) If applicable, describe analytical methods taking account of sampling strategy | Methods—Participants; Methods—Statistical analysis |
|  | (e) Describe any sensitivity analyses | Not applicable |
| **Results** | | |
| 13 | (a) Report numbers of individuals at each stage of study—eg numbers potentially eligible, examined for eligibility, confirmed eligible, included in the study, completing follow-up, and analysed | Methods—Participants; Results—Participant characteristics |
|  | (b) Give reasons for non-participation at each stage | Methods—Participants |
|  | (c) Consider use of a flow diagram | Not included (straightforward cross-sectional design) |
| 14 | (a) Descriptive data: Give characteristics of study participants (eg demographic, clinical, social) and information on exposures and potential confounders | Results—Participant characteristics; Table 1 |
|  | (b) Indicate number of participants with missing data for each variable of interest | Methods—Participants |
| 15 | Outcome data: Report numbers of outcome events or summary measures | Results; Tables 1-3 |
| 16 | (a) Main results: Give unadjusted estimates and, if applicable, confounder-adjusted estimates and their precision (eg, 95% confidence interval). Make clear which confounders were adjusted for and why they were included | Results—all subsections; Tables 2-3; Figures 1-3 |
|  | (b) Report category boundaries when continuous variables were categorized | Methods—Statistical analysis; Results—Comparison between groups |
|  | (c) If relevant, consider translating estimates of relative risk into absolute risk for a meaningful time period | Results—Comparison between groups (effect sizes reported) |
| 17 | Other analyses: Report other analyses done—eg analyses of subgroups and interactions, and sensitivity analyses | Results—Additional correlational findings; Results—Department-level association |
| **Discussion** | | |
| 18 | Key results: Summarise key results with reference to study objectives | Discussion—Summary of findings; Results—Summary of key findings |
| 19 | Limitations: Discuss limitations of the study, taking into account sources of potential bias or imprecision. Discuss both direction and magnitude of any potential bias | Discussion—Strengths and limitations |
| 20 | Interpretation: Give a cautious overall interpretation of results considering objectives, limitations, multiplicity of analyses, results from similar studies, and other relevant evidence | Discussion—Comparison with prior research; Discussion—Potential mechanisms |
| 21 | Generalisability: Discuss the generalisability (external validity) of the study results | Discussion—Strengths and limitations |
| **Other information** | | |
| 22 | Funding: Give the source of funding and the role of the funders for the present study and, if applicable, for the original study on which the present article is based | Declarations—Funding |

*Note: This checklist is based on the STROBE Statement (Strengthening the Reporting of Observational Studies in Epidemiology). Reference: von Elm E, Altman DG, Egger M, et al. The STROBE statement: guidelines for reporting observational studies. Lancet. 2007;370(9596):1453-7.*
